# Supplementary material
Source: PubMed Central journal article supplement (PMC6679748)
Supplement: NIHMS1530653-supplement-1.pdf [file NIHMS1530653-supplement-1.pdf]

## Table of contents

|                                                                                             |              |
|---------------------------------------------------------------------------------------------|--------------|
| <b>Section 1: Supplementary Materials and Methods.....</b>                                  | <b>2-8</b>   |
| <b>Section 2: Supplementary Tables.....</b>                                                 | <b>9-14</b>  |
| <b>Supplementary Table S3. Tools and databases used in this study.....</b>                  | <b>9</b>     |
| <b>Supplementary Table S4. Primers used for validating variants.....</b>                    | <b>10</b>    |
| <b>Supplementary Table S6. Putative driver gene mutations.....</b>                          | <b>11</b>    |
| <b>Supplementary Table S8. Mutated MAPK genes mapped to KEGG pathway (cfa:04010).....</b>   | <b>12</b>    |
| <b>Supplementary Table S9. Mutated PI3K-AKT genes mapped to KEGG pathway (cfa:04151)...</b> | <b>13-14</b> |
| <b>References.....</b>                                                                      | <b>15</b>    |

## **Section 1: Supplementary Materials and Methods**

### **Cell line validation methods**

The following methods were used for cell line validation.

#### **A. Mycoplasma Testing**

We used a PCR based method with an internal standard to detect mycoplasma contamination on each cell lines. This protocol is utilized at the Department of Human and Animal Cell Lines (DSMZ), Germany (1).

#### **B. Species PCR**

We tested each of the genomic DNA samples by a multiplex PCR reaction that amplifies a unique fragment for each of 6 commonly used species including human, cat, Chinese hamster, rat, dog, and mouse. This PCR reaction is based on the protocol developed by Cooper et al. 2007 (2).

#### **C. STR Analysis**

Isolated genomic DNA from each cell line was amplified using the StockMarks™ for Dogs Genotyping Kit, canine (Catalog number: 4307481) from Thermo Fisher Scientific. This kit utilizes multiple fluorescent dye labeled PCR primers to amplify 10 unique microsatellite markers (STRs) simultaneously in a multiplex PCR reaction. The resulting PCR products are analyzed using fragment analysis with size standards. Identified peaks are hand-binned and compared to 65 previously analyzed canine cell lines using an algorithm written in java (Supplementary Table S2) (3).

### **Putative driver mutation identification**

Using the cBioPortal (v1.14.0, <http://www.cbioportal.org/>) website, driver mutations were identified in cancer genes. We manually queried 232 cancer genes, identified in this study, against all 224 studies with 64,461 samples incorporated in cBioPortal (<http://bit.ly/2u9UfWt>).

Any canine cancer gene variant homologous to known human oncogenic or predicted oncogenic variants was classified as putative cancer driver. The variant driver predictions were based on OncoKB, cancer hotspots, and literature searches.

### **Functional annotation of level 2 variants**

The protein coding genes (level 2) were used to identify the signaling pathways and gene ontology terms that were enriched in each cell line. The gene lists for each cell line were used as input for the DAVID functional annotation tool (4). The three databases used for this study were Gene Ontology Consortium, Kyoto Encyclopedia of Genes and Genome (KEGG), and Pfam (5-7). In order to identify additional relevant genes that may contribute to cancer development and progression, we selected functional categories that have: at least one cancer gene and were in at least six of the 33 cell lines.

### **Serum starvation analysis**

Constitutive activation of MAPK and PI3K/AKT pathways was assessed by examining the effects of serum starvation on the phosphorylation status of ERK1/2 and pan-AKT, respectively. After 24 hours of serum starvation, the cells from all 33 cell lines were harvested and total and phosphorylated protein levels were assessed with western blot analysis. The cell lines were categorized based on ERK or AKT activation: 1. Constitutive – if there was no decrease in levels of proteins or phosphorylation was increased with serum starvation; 2. Activated: if phosphorylation was high in the presence of serum but decreased or absent with serum starvation; and 3. Low Expression/Phosphorylation: if expression or phosphorylation was low relative to other cell lines.

### **Western blot analysis**

Cells were washed with ice-cold PBS and lysed with 100  $\mu$ l of RIPA buffer (20 mM Tris-HCl, 150 mM NaCl, 1 mM Na<sub>2</sub>EDTA, 1 mM EGTA, 1% NP-40, and 1% sodium deoxycholate, 50

mM NaF, 2.5 mM sodium pyrophosphate, 1 mM beta-glycerophosphate, 1mM Na<sub>3</sub>VO<sub>4</sub>, and 1 ug/ml leupeptin) for 5 min on ice. Lysates were collected, sonicated on ice, and centrifuged at 14,000 x g for 10 min at 4 °C. Supernatants were collected and stored at -80 °C until use. Total protein was quantified (Pierce BCA Protein Assay Kit, Catalog number: 23225, Thermo Fisher) and samples were boiled for 5 min at 95 °C in 2X Laemmli Sample Buffer (BioRad) to denature protein. Equal amounts of protein were resolved on 4-20% Criterion TGX Protein Gels (BioRad) and transferred to PVDF membranes. Membranes were blocked for one hour at room temperature in blocking buffer (20 mM Tris HCl, pH 8.0; 150 mM NaCl; 0.1% Tween 20; 5% BSA). Membranes were assessed for NF1, p-ERK1/2, total ERK1/2, p-AKT, total AKT, and tubulin expression using recommended conditions and antibody dilutions. The primary antibodies used in this study were: NF1 (C terminus) #ab17963, P-p44/42 MAPK (Thr202/Tyr204) #4370, p44/42 MAPK #4695, Phospho-AKT (Ser473) #9271, pan-AKT #9272, Cell Signaling,  $\alpha$ -tubulin mouse ab #T5168, Sigma Aldrich (1:1000 dilution), and beta actin (ab8227), Abcam (1:5000 dilution). When multiple primary antibodies were tested on the same blot, membranes were stripped twice using Re-Blot Plus Western Blot Strong Antibody Stripping Solution (1x) (Millipore) for 15-25 minutes at room temperature. These blots were blocked twice in blocking buffers for 5 minutes and re-probed with primary antibodies at recommended conditions and dilutions. Following incubation with primary antibodies, blots were washed with TBST (20 mM Tris HCl, pH 8.0; 150 mM NaCl; 0.1% Tween 20) and incubated with secondary antibodies (goat anti-rabbit IgG HRP-conjugated or goat anti-mouse IgG HRP-conjugated, 1:10,000 dilution, BioRad) for one hour at room temperature. Membranes were washed with TBST, developed with Clarity Western ECL Blotting Substrate (BioRad), and imaged with a Chemi Doc XES+ System (BioRad).

## Command lines used for processing the canine cancer cell line WES data.

### # Trimming of raw reads - Trimmomatic

```
java -jar -Xmx48G Trimmomatic-0.36/trimmomatic-0.36.jar PE -phred33 \  
SampleName_R1.fastq.gz SampleName_R2.fastq.gz \  
SampleName_R1_paired.fastq.gz SampleName_R1_unpaired.fastq.gz \  
SampleName_R2_paired.fastq.gz SampleName_R2_unpaired.fastq.gz \  
Trimmomatic-0.36/adapters/TruSeq3-SE.fa:2:30:10 \  
CROP:130 LEADING:3 TRAILING:3 SLIDINGWINDOW:4:20 MINLEN:50
```

### # Mapping of trimmed reads against CanFam3.1 genome – BWA

#### # Reference genome was downloaded from

[ftp://ftp.ensembl.org/pub/release-90/fasta/canis\\_familiaris/dna/](ftp://ftp.ensembl.org/pub/release-90/fasta/canis_familiaris/dna/) and indexed using BWA index tool

```
bwa mem -M -t 12 \  
-R '@RG\tID:ID\tSM:SampleName\tPL:illumina\tLB:lib1\tPU:indexsequence' \  
CanFam3 \  
SampleName_R1_paired.fastq.gz SampleName_R2_paired.fastq.gz >
```

### # Sorting SAM file - Picard Tools

```
java -jar picard-tools-1.119/SortSam.jar \  
TMP_DIR=tempSampleName \  
I=SampleName_BWA.sam \  
O=SampleName_BWA_sorted.sam \  
SORT_ORDER=coordinate
```

### # Marking duplicates - Picard Tools

```
java -jar picard-tools-1.119/MarkDuplicates.jar \  
TMP_DIR=tempSampleName \  
I=SampleName_BWA_sorted.sam \  
O=SampleName_dedup.bam \  
M=SampleName_marked_dup_metrics.txt
```

### # Indexing BAM file - Samtools

```
samtools index SampleName_dedup.bam
```

### # GATK RealignerTargetCreator - GATK

```
java -jar GenomeAnalysisTK.jar \  
-T RealignerTargetCreator \  
-R Canis_familiaris.CanFam3.1.dna.toplevel.fa \  
-I SampleName_dedup.bam \  
-o SampleName_target_intervals.list
```

### # GATK realignment of indels - GATK

```
java -jar GenomeAnalysisTK.jar \  
-T IndelRealigner \  
-R Canis_familiaris.CanFam3.1.dna.toplevel.fa \  
-I SampleName_dedup.bam \  
-targetIntervals SampleName_target_intervals.list \  
-o SampleName_realigned_reads.bam
```

### # GATK Recalibration of bases - GATK

# The variant file - Canis\_familiaris.vcf was downloaded from :-  
[ftp://ftp.ensembl.org/pub/release-90/variation/vcf/canis\\_familiaris/](ftp://ftp.ensembl.org/pub/release-90/variation/vcf/canis_familiaris/)

```
java -jar GenomeAnalysisTK.jar \  
-T BaseRecalibrator \  
-R Canis_familiaris.CanFam3.1.dna.toplevel.fa \  
-I SampleName_realigned_reads.bam \  
-knownSites Canis_familiaris.vcf \  
-o SampleName_recal_data.grp
```

### # GATK Print reads - GATK

```
java -jar GenomeAnalysisTK.jar \  
-T PrintReads \  
-R Canis_familiaris.CanFam3.1.dna.toplevel.fa \  
-I SampleName_realigned_reads.bam \  
-BQSR SampleName_recal_data.grp \  
-o SampleName_recal_reads.bam
```

### # Coverage - GATK

# The bed file provides chromosomal intervals used for creating the Agilent Sure Select exome capture

```
java -jar GenomeAnalysisTK.jar \  
-T DepthOfCoverage \  
-R Canis_familiaris.CanFam3.1.dna.toplevel.fa \  
-I SampleName_recal_reads.bam \  
-L Dog_Exome.bed \  
--outputFormat table \  
-o SampleName \  
-l DEBUG
```

### # Extracting raw variants - Freebayes

```
freebayes -f Canis_familiaris.CanFam3.1.dna.toplevel.fa \  
--min-alternate-fraction 0.05 \  
--min-mapping-quality 50 \  
--min-alternate-count 2 \  
SampleName_recal_reads.bam > SampleName_freebayes.vcf
```

### # Annotation of known variants - SnpEff (using version 89 of Ensembl; NCBI 146 built)

```
java -Xmx10g -jar SnpSift.jar annotate \  
-id Canis_familiaris.vcf \  
SampleName_freebayes.vcf > SampleName_freebayesSS.ann.vcf
```

### # Adding information on variant type - SnpEff

```
java -Xmx10g -jar SnpSift.jar varType \  
SampleName_freebayesSS.ann.vcf > SampleName_freebayesSS-VT.ann.vcf
```

### # Annotating variants – SnpEff

```
java -Xmx10g -jar snpEff.jar -stats SampleName_snpEff_summary.html \  
CanFam3.1.86 SampleName_freebayesSS-VT.ann.vcf > \  
SampleName_freebayes.snpEff.ann.vcf
```

### # Filtering variants with DP>=10 - SnpEff

```
cat SampleName_freebayes.snpEff.ann.vcf | \  
java -Xmx4g -jar SnpSift.jar filter " ( DP >= 10 )" \  
> SampleName_freebayes.snpEff-filtDP.vcf
```

### # Filtering variants with QUAL>=20 - SnpEff

```
cat SampleName_freebayes.snpEff-filtDP.vcf | \  
java -Xmx4g -jar SnpSift.jar filter " ( QUAL >= 20 )" \  
> SampleName_freebayes.snpEff-filtDP-QUAL.vcf
```

### # Zipping and indexing vcf file - bgzip and tabix

```
bgzip -c SampleName_freebayes.snpEff-filtDP-QUAL.vcf > \  
SampleName_freebayes.snpEff-filtDP-QUAL.vcf.gz  
  
tabix -p vcf SampleName_freebayes.snpEff-filtDP-QUAL.vcf.gz
```

### # Eliminating Germline/Normal variants - vcftools

```
vcf-isec -c -f -d -o SampleName_freebayes.snpEff-filtDP-QUAL.vcf.gz \  
Normals.vcf.gz \  
| bgzip -c > SampleName_VCFisec.vcf.gz
```

### # Converting vcf to tab format - bcftools

```
bcftools query -H -f  
'%CHROM\t%POS\t%ID\t%REF\t%ALT\t%FILTER[\t%GT\t%DP\t%AD\t%AO\t%  
GL]\t%INFO/AF\t%INFO/AC\t%INFO/MQM\t%INFO/VARTYPE\t%INFO/ANN\n'  
-u -o SampleName.tab SampleName_VCFisec.vcf.gz
```

### # SIFT prediction - SIFT4G

```
java -jar -Xmx1024m SIFT4G_Annotator_v2.3.jar -c \  
-i SampleName_freebayes_VCFisec-filtered.vcf \  
-d SIFT4G_database/CanFam3.1.83/\  
-r SIFT_folder -t
```

### # Generating lollipop plots – lollipops

```
lollipops -show-motifs -dpi=300 -w=700 -labels -no-patterns -legend  
-domain-labels=off -U <Uniprot_ID> <Variations>
```



## Section 2. Supplementary Tables.

**Supplementary Table S3.** Tools and databases used in this study.

| <b>Tool/Resource/Database</b>        | <b>Version</b>                             | <b>Reference / Download URL</b>                                                                                                                                                                                                           |
|--------------------------------------|--------------------------------------------|-------------------------------------------------------------------------------------------------------------------------------------------------------------------------------------------------------------------------------------------|
| FASTQC                               | 0.11.5                                     | Andrews 2010 (8)                                                                                                                                                                                                                          |
| Trimmomatic                          | 0.36                                       | Bolger et al 2014 (9)                                                                                                                                                                                                                     |
| BWA                                  | 0.7.15                                     | Li and Durbin 2010 (10)                                                                                                                                                                                                                   |
| samtools                             | 1.4.1                                      | Li 2009 (11)                                                                                                                                                                                                                              |
| Picard-tools                         | 1.119                                      | <a href="http://broadinstitute.github.io/picard/">http://broadinstitute.github.io/picard/</a>                                                                                                                                             |
| GenomeAnalysisToolKit                | 3.7-0-gcfedb67                             | Van der Auwera et al 2013 (12)                                                                                                                                                                                                            |
| Freebayes                            | v1.1.0-3-g961e5f3                          | Garrison and Marth 2012 (13)                                                                                                                                                                                                              |
| SnpEff                               | 4.3p (2017-06-06)                          | Cingolani et al 2012 (14)                                                                                                                                                                                                                 |
| Tabix                                | 1.6-14-g199ab97                            | Li 2011 (15)                                                                                                                                                                                                                              |
| VCFtools                             | 0.1.13                                     | Danecek et al 2011 (16)                                                                                                                                                                                                                   |
| bcftools                             | 1.6                                        | <a href="https://github.com/samtools/bcftools">https://github.com/samtools/bcftools</a>                                                                                                                                                   |
| SIFT                                 | 2.3                                        | Kumar et al 2009 (17)                                                                                                                                                                                                                     |
| Lollipops                            | 1.3.2                                      | Jay and Brouwer (18)                                                                                                                                                                                                                      |
| R                                    | 3.4.4                                      | R Core Team 2018 (19)                                                                                                                                                                                                                     |
| ComplexHeatmap                       | 1.17.1                                     | Gu et al 2016 (20)                                                                                                                                                                                                                        |
| <i>Canis lupus familiaris</i> genome | Ensembl v89                                | <a href="ftp://ftp.ensembl.org/pub/release-89/fasta/canis_familiaris/dna/Canis_familiaris.CanFam3.1.dna.toplevel.fa.gz">ftp://ftp.ensembl.org/pub/release-89/fasta/canis_familiaris/dna/Canis_familiaris.CanFam3.1.dna.toplevel.fa.gz</a> |
| dbSNP vcf file                       | Ensembl v90; dbSNP built 146               | <a href="ftp://ftp.ensembl.org/pub/release-89/variation/vcf/canis_familiaris/Canis_familiaris.vcf.gz">ftp://ftp.ensembl.org/pub/release-89/variation/vcf/canis_familiaris/Canis_familiaris.vcf.gz</a>                                     |
| COSMIC database                      | v83; downloaded June 12 <sup>th</sup> 2018 | <a href="https://cancer.sanger.ac.uk/cosmic/download">https://cancer.sanger.ac.uk/cosmic/download</a>                                                                                                                                     |
| Dog SNP database                     | Downloaded July 10 <sup>th</sup> 2017      | <a href="ftp://ai.et al 2015/download.big.ac.cn/dogsd/dogsd_total_VCF/DOGSD-vcf.gz">ftp://ai et al 2015/download.big.ac.cn/dogsd/dogsd_total_VCF/DOGSD-vcf.gz</a> ; Bai et al 2015 (21)                                                   |
| David Functional Annotation Tool     | 6.7                                        | Huang et al. 2009 (4)                                                                                                                                                                                                                     |

**Supplementary Table S4.** Primers used for validating variants.

| <b>Gene Name</b> | <b>Exon</b> | <b>5' Primer</b>      | <b>3' Primer</b>       |
|------------------|-------------|-----------------------|------------------------|
| CUX1             | 17          | AGGACGCCAAGTCAGAAGAA  | AGCTCAATGGTGTCCACCTC   |
| FAT3             | 27          | TAGACAGCGCAAGTGGCTTA  | TAGACAGCGCAAGTGGCTTA   |
| KIT1             | 11          | CATTTGTTCTCTACCTAAGTG | GTTCCCTAAAGTCATTGTTACA |
| KRAS             | 1           | TCAAATGTTGTTGGGGGAGT  | TAAAGCCAATGGAACCCAAG   |
| KRAS             | 2           | TGTCACCTTTGGAGGAATGTC | AAGCCAAGGTTTCAATTCCA   |
| KTM2D            | 39          | AGGGTCCTCACAGACAGGTG  | TGCTGCTGTGGAGACAGTAAA  |
| MET1             | 17          | CCCCTGTGCTTTGCTGTTTC  | CTAGGCGGTTCGCTAAAGAGG  |
| NRAS             | 2           | GCATTGCATTCCCTATGGTT  | GCGGTATCCTCATTTCCTGT   |
| PIK3CA           | 21          | ATGCCAGTTTCTGCCTGTCT  | CACACTGCTGAACCAGTCAAA  |
| TP53             | 4           | GACCTGACCCTTGACTCTGG  | GGACCGAGAGGAGTCTCAA    |
| TP53             | 5-6         | CGCGCTATGGCCATCTATAA  | ATTCCTTCCACTCGGATGAG   |
| TP53             | 7           | TGGGAAAGACTGAGGCTGAT  | GGGGGTACAGTAAGGAAGTGG  |
| TP53             | 8           | TGAGGGTGGCTAGGAGTCAG  | TCCCTCCTTCACCTCCTCTT   |

**Supplementary Table S6. Putative driver gene mutations.**

| <b>Gene Name</b> | <b>Cell Lines (Amino Acid Change)</b>                                                                                                                                                              | <b>Alternate Allele Frequency</b>                                         | <b>SIFT Score</b>                                                                          | <b>Functional Category</b> |
|------------------|----------------------------------------------------------------------------------------------------------------------------------------------------------------------------------------------------|---------------------------------------------------------------------------|--------------------------------------------------------------------------------------------|----------------------------|
| <i>ARID1A</i>    | Tyler2 (A901fs); Tyler1 (A901fs)                                                                                                                                                                   | 0.49; 0.38                                                                | NA                                                                                         | CBO                        |
| <i>ASXL1</i>     | OSW (G618fs); Jones (G618fs)                                                                                                                                                                       | 0.45; 0.41                                                                | NA                                                                                         | CBO                        |
| <i>ATRX</i>      | Tyler1 (C1810*); Tyler2 (C1810*)                                                                                                                                                                   | 1; 0.99                                                                   | NA                                                                                         | CBO                        |
| <i>BRAF</i>      | Vogel (V588E); Tyler1 (V588E); Tyler2 (V588E); Bliley (V588E)                                                                                                                                      | 0.3; 0.41; 0.38; 0.43                                                     | 0.002                                                                                      | KA; GA                     |
| <i>CCND3</i>     | CLBL1 (R358fs)                                                                                                                                                                                     | 0.51                                                                      | NA                                                                                         | KA                         |
| <i>CDKN1A</i>    | Parks (D33fs)                                                                                                                                                                                      | 0.83                                                                      | NA                                                                                         | KA                         |
| <i>CIC</i>       | 1771 (P1551fs)                                                                                                                                                                                     | 0.68                                                                      | NA                                                                                         | CBO                        |
| <i>EIF1AX</i>    | Parks (G6S)                                                                                                                                                                                        | 0.72                                                                      | 0.098                                                                                      | RB                         |
| <i>EP300</i>     | SB (N1570fs)                                                                                                                                                                                       | 0.29                                                                      | NA                                                                                         | CBO                        |
| <i>ERBB2</i>     | CTAC (V659E)                                                                                                                                                                                       | 1                                                                         | 0.011                                                                                      | KA                         |
| <i>FBXW7</i>     | OSW (R694Q)                                                                                                                                                                                        | 0.49                                                                      | 0.006                                                                                      | KA                         |
| <i>KDM6A</i>     | OSA8 (T986fs); CLL1390 (V1131fs)                                                                                                                                                                   | 1; 0.97                                                                   | NA                                                                                         | CBO                        |
| <i>KIT</i>       | 17CM98 (V558_E560del); BRMCT (L575P)                                                                                                                                                               | 0.6; 0.47                                                                 | NA; 0                                                                                      | KA                         |
| <i>KMT2C</i>     | OSW (G976fs); CMT12 (R1201fs)                                                                                                                                                                      | 0.41; 0.92                                                                | NA                                                                                         | CBO                        |
| <i>KMT2D</i>     | OSW (Q5395fs)                                                                                                                                                                                      | 0.99                                                                      | NA                                                                                         | CBO                        |
| <i>KRAS</i>      | D-17 (E63K); Angus (G12D); CML-10C2 (G12V)                                                                                                                                                         | 0.19; 0.63; 0.76                                                          | 0.002; 0; 0.001                                                                            | KA; GA                     |
| <i>MED12</i>     | Vogel (L1349fs); McKinley (L1938fs); Parks (P22S)                                                                                                                                                  | 0.41; 0.97; 0.48                                                          | NA; 0                                                                                      | CBO                        |
| <i>NF1</i>       | OSW (N58fs); STSA-1 (M877fs); CML-6M (P1599fs); Nike (A2176fs)                                                                                                                                     | 0.99; 0.48; 0.44; 1                                                       | NA                                                                                         | KA                         |
| <i>NRAS</i>      | Jones (Q61R); Moresco (Q61H)                                                                                                                                                                       | 0.46; 0.53                                                                | 0.048; 0.002                                                                               | KA; GA                     |
| <i>PIK3CA</i>    | SB (E453K)                                                                                                                                                                                         | 1                                                                         | 0.184                                                                                      | KA                         |
| <i>PPM1D</i>     | McKinley (E472*)                                                                                                                                                                                   | 0.49                                                                      | NA                                                                                         | CBO                        |
| <i>PTEN</i>      | OSW (K245fs); Jones (D246fs)                                                                                                                                                                       | 1; 0.43                                                                   | NA                                                                                         | KA                         |
| <i>PTPN11</i>    | DH82 (G503V)                                                                                                                                                                                       | 0.99                                                                      | 0.008                                                                                      | KA                         |
| <i>RAC1</i>      | Moresco (P29T)                                                                                                                                                                                     | 0.35                                                                      | 0.01                                                                                       | KA; GA                     |
| <i>SETD2</i>     | BRMCT (R526fs)                                                                                                                                                                                     | 0.99                                                                      | NA                                                                                         | CBO                        |
| <i>SPEN</i>      | OSW (A8fs)                                                                                                                                                                                         | 0.36                                                                      | NA                                                                                         | RB                         |
| <i>SRGAP3</i>    | Gracie (V850fs)                                                                                                                                                                                    | 0.45                                                                      | NA                                                                                         | GA                         |
| <i>TET2</i>      | CLL1390 (Q965*)                                                                                                                                                                                    | 0.99                                                                      | NA                                                                                         | CBO                        |
| <i>TP53</i>      | BRMCT (A193D, R263C); SB (L184F, A150fs); Vogel (V162L); Abrams (C267F); HMPOS (R164H); CLBL1 (R257H; A127V); OS2.4 (I222T); OSW (R164H); CMT12 (V132E); C2 (V162A); CLL1390 (D60fs); CTAC (T114M) | 0.48, 0.46; 0.51, 0.48; 0.75; 0.51; 1; 0.46, 0.45; 1; 0.56; 1; 1; 0.63; 1 | 0.003, 0; 0.096, NA; 0.004; 0.001; 0.001; 0.003, 0.037; 0.018;; 0.001; 0.001; 0.002; NA; 0 | CBO                        |

CBO - Chromatin binding/organization; KA – regulation of kinase activity; GA – GTPase binding and activity; RB – RNA binding

**Supplementary Table S8. Mutated MAPK genes mapped to KEGG pathway (cfa:04010).**

The KEGG Gene Name corresponds to the gene nomenclature used in the KEGG pathway map (Supplementary Figure S4).

| Gene Name | KEGG Gene Name | Cell Line | Cancer Type                 | Protein Variant   |
|-----------|----------------|-----------|-----------------------------|-------------------|
| BRAF      | RafB           | Tyler1    | Transitional Cell Carcinoma | V588E             |
| BRAF      | RafB           | Bliley    | Transitional Cell Carcinoma | V588E             |
| BRAF      | RafB           | Tyler2    | Transitional Cell Carcinoma | V588E             |
| BRAF      | RafB           | Vogel     | Osteosarcoma                | V588E             |
| CACNA1A   | CANC           | OSW       | Leukemia / Lymphoma         | A715V             |
| CACNA1C   | CANC           | CLL1390   | Leukemia / Lymphoma         | R1374S            |
| CACNA1C   | CANC           | Tyler2    | Transitional Cell Carcinoma | M2114I            |
| CACNA1D   | CANC           | Jones     | Melanoma                    | R1531G            |
| CACNA1E   | CANC           | Tyler2    | Transitional Cell Carcinoma | P109S             |
| CACNA1E   | CANC           | Tyler1    | Transitional Cell Carcinoma | P109S             |
| CACNA1F   | CANC           | Parks     | Melanoma                    | P1492L            |
| CACNA1H   | CANC           | OSW       | Leukemia / Lymphoma         | R271Q             |
| CACNA2D2  | CANC           | D-17      | Osteosarcoma                | E451G             |
| CACNA2D3  | CANC           | Abrams    | Osteosarcoma                | L598fs            |
| CDC25B    | Cdc25B         | Kinsey    | Transitional Cell Carcinoma | P30L              |
| CHUK      | IKK            | D-17      | Osteosarcoma                | L37P              |
| DAXX      | DAXX           | OS2-4     | Osteosarcoma                | R229fs            |
| DUSP16    | MKP            | CLL1390   | Leukemia / Lymphoma         | G385A             |
| DUSP5     | MKP            | D-17      | Osteosarcoma                | T321M             |
| DUSP9     | MKP            | Parks     | Melanoma                    | R227C             |
| EGFR      | RTK            | SB        | Hemangiosarcoma             | R1039W            |
| FGF17     | GF             | CTAC      | Thyroid Carcinoma           | R208C             |
| FOS       | c-fos          | Kinsey    | Transitional Cell Carcinoma | K250fs            |
| KRAS      | Ras            | CML-10C2  | Melanoma                    | G12V              |
| KRAS      | Ras            | Angus     | Transitional Cell Carcinoma | G12D              |
| KRAS      | Ras            | D-17      | Osteosarcoma                | E63K              |
| MAP3K4    | MEKK4          | BRMCT     | Mast Cell Tumor             | P32_P33dup        |
| MAP3K4    | MEKK4          | D-17      | Osteosarcoma                | P45_E46dup        |
| MAP3K4    | MEKK4          | McKinley  | Osteosarcoma                | P45_E46dup        |
| MAP3K5    | ASK1           | C2        | Mast Cell Tumor             | V1121_V1122insVLF |
| MAP3K6    | ASK2           | Kinsey    | Transitional Cell Carcinoma | R531W             |
| MAP3K6    | ASK2           | 1771      | Leukemia / Lymphoma         | V833fs            |
| MAPK1     | ERK            | CLL1390   | Leukemia / Lymphoma         | M1_A2insA         |
| MAPT      | Tau            | Kinsey    | Transitional Cell Carcinoma | S609N             |
| MECOM     | Evil           | Moresco   | Osteosarcoma                | K561N             |
| NF1       | NF1            | OSW       | Leukemia / Lymphoma         | N58fs             |
| NF1       | NF1            | STSA-1    | Soft Tissue Sarcoma         | M877fs            |
| NF1       | NF1            | Nike      | Histiocytic Sarcoma         | A2176fs           |
| NF1       | NF1            | CML-6M    | Melanoma                    | P1599fs           |
| NFATC1    | NFAT-2         | Vogel     | Osteosarcoma                | T910M             |
| NFKB1     | NFκB           | Bliley    | Transitional Cell Carcinoma | V21fs             |
| NR4A1     | Nur77          | HMPOS     | Osteosarcoma                | R441H             |
| NRAS      | Ras            | Jones     | Melanoma                    | Q61R              |
| NRAS      | Ras            | Moresco   | Osteosarcoma                | Q61H              |
| PLA2G4E   | cPLA2          | Tyler1    | Transitional Cell Carcinoma | I15V              |
| PLA2G4E   | cPLA2          | Tyler2    | Transitional Cell Carcinoma | I15V              |
| PPP3CB    | PPP3C          | Parks     | Melanoma                    | L140S             |
| RAC1      | Cdc42/Rac      | Moresco   | Osteosarcoma                | P29T              |
| RASGRF2   | RasGRF         | 17CM98    | Melanoma                    | T499A             |
| RPS6KA2   | RSK2           | OSW       | Leukemia / Lymphoma         | G102fs            |
| TAOK1     | TAO            | Parks     | Melanoma                    | R562*             |

**Supplementary Table S9.** Mutated PI3K-AKT genes mapped to KEGG pathway (cfa:04151). The KEGG Gene Name corresponds to the gene nomenclature used in the KEGG pathway map (Supplementary Figure S5).

| Gene Name | KEGG Gene Name | Cell Line | Cancer Type                 | Protein Variant |
|-----------|----------------|-----------|-----------------------------|-----------------|
| PRKAA1    | AMPK           | C2        | Mast Cell Tumor             | V39F            |
| MYB       | C-Myb          | CLL1390   | Leukemia / Lymphoma         | N68I            |
| RAC1      | Cdc42/Rac      | Moresco   | Osteosarcoma                | P29T            |
| THEM4     | CTMP           | Nike      | Histiocytic Sarcoma         | S171L           |
| CCND3     | Cyclin         | C2        | Mast Cell Tumor             | A66_S67del      |
| CCND3     | Cyclin         | CLBL1     | Leukemia / Lymphoma         | R358fs          |
| CSF3R     | CytokineR      | Parks     | Melanoma                    | L825F           |
| COL1A2    | ECM            | Nike      | Histiocytic Sarcoma         | E1230Q          |
| COL4A2    | ECM            | Tyler2    | Transitional Cell Carcinoma | G755E           |
| COL4A2    | ECM            | Tyler1    | Transitional Cell Carcinoma | G755E           |
| COL4A4    | ECM            | OS2.4     | Osteosarcoma                | P1204S          |
| COL4A4    | ECM            | Nike      | Histiocytic Sarcoma         | G918R           |
| COL6A3    | ECM            | CLBL1     | Leukemia / Lymphoma         | G2293*          |
| COL6A5    | ECM            | Angus     | Transitional Cell Carcinoma | R1207fs         |
| COL6A5    | ECM            | CLL1390   | Leukemia / Lymphoma         | I847F           |
| LAMA1     | ECM            | McKinley  | Osteosarcoma                | D2753H          |
| LAMA4     | ECM            | Parks     | Melanoma                    | S495L           |
| LAMC2     | ECM            | HMPOS     | Osteosarcoma                | S23P            |
| LAMC2     | ECM            | Nike      | Histiocytic Sarcoma         | I955T           |
| LAMC2     | ECM            | Nike      | Histiocytic Sarcoma         | N958T           |
| RELN      | ECM            | Moresco   | Osteosarcoma                | L972H           |
| THBS2     | ECM            | OSW       | Leukemia / Lymphoma         | R482C           |
| TNC       | ECM            | Tyler2    | Transitional Cell Carcinoma | T1394M          |
| TNC       | ECM            | 1771      | Leukemia / Lymphoma         | G2179R          |
| TNC       | ECM            | Tyler1    | Transitional Cell Carcinoma | T1394M          |
| VWF       | ECM            | CMT12     | Mammary Carcinoma           | S182_P184del    |
| VWF       | ECM            | Parks     | Melanoma                    | W377*           |
| EIF4B     | eIF4B          | Parks     | Melanoma                    | R182C           |
| MAPK1     | ERK            | CLL1390   | Leukemia / Lymphoma         | M1_A2insA       |
| GNG3      | GBG            | Nike      | Histiocytic Sarcoma         | F66L            |
| ANGPT4    | GF             | OSW       | Leukemia / Lymphoma         | R494C           |
| FGF17     | GF             | CTAC      | Thyroid Carcinoma           | R208C           |
| CHUK      | IKK            | D-17      | Osteosarcoma                | L37P            |
| ITGA1     | ITGA           | D-17      | Osteosarcoma                | A597T           |
| ITGA6     | ITGA           | Nike      | Histiocytic Sarcoma         | I859S           |
| ITGA9     | ITGA           | OSW       | Leukemia / Lymphoma         | T582fs          |
| ITGAV     | ITGA           | DEN-HSA   | Hemangiosarcoma             | M956_P957dup    |
| ITGB7     | ITGB           | Tyler1    | Transitional Cell Carcinoma | R247L           |
| ITGB7     | ITGB           | Nike      | Histiocytic Sarcoma         | L133fs          |
| ITGB7     | ITGB           | Nike      | Histiocytic Sarcoma         | A132fs          |
| ITGB7     | ITGB           | C2        | Mast Cell Tumor             | A132fs          |
| ITGB7     | ITGB           | Parks     | Melanoma                    | L133fs          |
| ITGB7     | ITGB           | Parks     | Melanoma                    | A132fs          |
| ITGB7     | ITGB           | Tyler2    | Transitional Cell Carcinoma | R247L           |
| ITGB7     | ITGB           | C2        | Mast Cell Tumor             | L133fs          |
| JAK3      | JAK            | Tyler2    | Transitional Cell Carcinoma | W993*           |
| MTOR      | mTOR           | 1771      | Leukemia / Lymphoma         | R32Q            |
| NFKB1     | NFKB           | Bliley    | Transitional Cell Carcinoma | V21fs           |
| NR4A1     | NUR77          | HMPOS     | Osteosarcoma                | R441H           |

| Gene Name | KEGG Gene Name | Cell Line | Cancer Type                 | Protein Variant |
|-----------|----------------|-----------|-----------------------------|-----------------|
| CDKN1A    | p21            | Parks     | Melanoma                    | D33fs           |
| CDKN1B    | p27; p27/Kip1  | CLL1390   | Leukemia / Lymphoma         | Ter199fs        |
| PCK2      | PEPCK          | Parks     | Melanoma                    | R276W           |
| PHLPP1    | PHLPP          | HMPOS     | Osteosarcoma                | A157_P158insP   |
| PHLPP1    | PHLPP          | CTAC      | Thyroid Carcinoma           | G971R           |
| PHLPP1    | PHLPP          | STSA-1    | Soft Tissue Sarcoma         | P84_A85del      |
| PKN1      | PKN            | Nike      | Histiocytic Sarcoma         | C1145Y          |
| PPP2R2B   | PP2A           | Parks     | Melanoma                    | D215V           |
| PPP2R3A   | PP2A           | Kinsey    | Transitional Cell Carcinoma | R981H           |
| PTEN      | PTEN           | OSW       | Leukemia / Lymphoma         | K245fs          |
| PTEN      | PTEN           | Jones     | Melanoma                    | D246fs          |
| KRAS      | Ras            | Angus     | Transitional Cell Carcinoma | G12D            |
| KRAS      | Ras            | CML-10C2  | Melanoma                    | G12V            |
| KRAS      | Ras            | D-17      | Osteosarcoma                | E63K            |
| NRAS      | Ras            | Moresco   | Osteosarcoma                | Q61H            |
| NRAS      | Ras            | Jones     | Melanoma                    | Q61R            |
| EGFR      | RTK            | SB        | Hemangiosarcoma             | R1039W          |
| KIT       | RTK            | BRMCT     | Mast Cell Tumor             | L575P           |
| KIT       | RTK            | 17CM98    | Melanoma                    | V558_E560del    |
| MET       | RTK            | HMPOS     | Osteosarcoma                | R1188Q          |
| SGK1      | SKG            | OSW       | Leukemia / Lymphoma         | F467fs          |
| TLR4      | TLR2/4         | C2        | Mast Cell Tumor             | Y38C            |
| EPHA2     | RTK            | SB        | Hemangiosarcoma             | G275S           |
| EPHA2     | RTK            | DEN-HSA   | Hemangiosarcoma             | D77V            |
| COL6A2    | ECM            | Vogel     | Osteosarcoma                | S56F            |

## References

1. CC, Drexler HG. Detection of Mycoplasma contamination in cell cultures. *Curr Protoc Mol Biol* **2014**;106:28.4.1-14 doi 10.1002/0471142727.mb2804s106.
2. Cooper JK, Sykes G, King S, Cottrill K, Ivanova NV, Hanner R, *et al.* Species identification in cell culture: a two-pronged molecular approach. *In Vitro Cell Dev Biol Anim* **2007**;43(10):344-51 doi 10.1007/s11626-007-9060-2.
3. O'Donoghue LE, Rivest JP, Duval DL. Polymerase chain reaction-based species verification and microsatellite analysis for canine cell line validation. *J Vet Diagn Invest* **2011**;23(4):780-5 doi 10.1177/1040638711408064.
4. Huang da W, Sherman BT, Zheng X, Yang J, Imamichi T, Stephens R, *et al.* Extracting biological meaning from large gene lists with DAVID. *Current protocols in bioinformatics* **2009**;Chapter 13:Unit 13.1 doi 10.1002/0471250953.bi1311s27.
5. Ashburner M, Ball CA, Blake JA, Botstein D, Butler H, Cherry JM, *et al.* Gene ontology: tool for the unification of biology. The Gene Ontology Consortium. *Nature genetics* **2000**;25(1):25-9 doi 10.1038/75556.
6. Kanehisa M, Goto S. KEGG: kyoto encyclopedia of genes and genomes. *Nucleic acids research* **2000**;28(1):27-30.
7. Finn RD, Bateman A, Clements J, Coghill P, Eberhardt RY, Eddy SR, *et al.* Pfam: the protein families database. *Nucleic acids research*. Volume 422014. p D222-30.
8. Andrews S. FastQC A Quality Control tool for High Throughput Sequence Data (<https://www.bioinformatics.babraham.ac.uk/projects/fastqc/>). 2010.
9. Bolger AM, Lohse M, Usadel B. Trimmomatic: a flexible trimmer for Illumina sequence data. *Bioinformatics (Oxford, England)* **2014**;30(15):2114-20 doi 10.1093/bioinformatics/btu170.
10. Li H, Durbin R. Fast and accurate long-read alignment with Burrows-Wheeler transform. *Bioinformatics (Oxford, England)* **2010**;26(5):589-95 doi 10.1093/bioinformatics/btp698.
11. Li H, Handsaker B, Wysoker A, Fennell T, Ruan J, Homer N, *et al.* The Sequence Alignment/Map format and SAMtools. *Bioinformatics (Oxford, England)* **2009**;25(16):2078-9 doi 10.1093/bioinformatics/btp352.
12. Van der Auwera GA, Carneiro MO, Hartl C, Poplin R, Del Angel G, Levy-Moonshine A, *et al.* From FastQ data to high confidence variant calls: the Genome Analysis Toolkit best practices pipeline. *Current protocols in bioinformatics* **2013**;43:11.0.1-33 doi 10.1002/0471250953.bi1110s43.
13. Garrison E, Marth G. Haplotype-based variant detection from short-read sequencing. **2012**.
14. Cingolani P, Platts A, Wang le L, Coon M, Nguyen T, Wang L, *et al.* A program for annotating and predicting the effects of single nucleotide polymorphisms, SnpEff: SNPs in the genome of *Drosophila melanogaster* strain w1118; iso-2; iso-3. *Fly* **2012**;6(2):80-92 doi 10.4161/fly.19695.
15. Li H. Tabix: fast retrieval of sequence features from generic TAB-delimited files. *Bioinformatics (Oxford, England)* **2011**;27(5):718-9 doi 10.1093/bioinformatics/btq671.
16. Danecek P, Auton A, Abecasis G, Albers CA, Banks E, DePristo MA, *et al.* The variant call format and VCFtools. *Bioinformatics (Oxford, England)* **2011**;27(15):2156-8 doi 10.1093/bioinformatics/btr330.

17. Kumar P, Henikoff S, Ng PC. Predicting the effects of coding non-synonymous variants on protein function using the SIFT algorithm. *Nature protocols* **2009**;4(7):1073-81 doi 10.1038/nprot.2009.86.
18. Jay JJ, Brouwer C. Lollipops in the Clinic: Information Dense Mutation Plots for Precision Medicine. *PLoS one* **2016**;11(8):e0160519 doi 10.1371/journal.pone.0160519.
19. Team RC. 2018 R: The R Project for Statistical Computing. <<https://www.r-project.org/>>.
20. Gu Z, Eils R, Schlesner M. Complex heatmaps reveal patterns and correlations in multidimensional genomic data. *Bioinformatics (Oxford, England)* **2016**;32(18):2847-9 doi 10.1093/bioinformatics/btw313.
21. Bai B, Zhao WM, Tang BX, Wang YQ, Wang L, Zhang Z, *et al.* DoGSD: the dog and wolf genome SNP database. *Nucleic acids research* **2015**;43(Database issue):D777-83 doi 10.1093/nar/gku1174.
